# Supplementary material for: Involvement of Vasopressin in the Pathogenesis of Pulmonary Tuberculosis: A New Therapeutic Target?
Source: PubMed Central journal article supplement (PMC6563385; doi:10.3389/fendo.2019.00351), 2019-06-06
Supplement: Table_1.pdf [file Table_1.pdf]

Supplementary Table 1

| <b>Target gene</b>            | <b>5'- 3'</b>                                            | <b>Product length</b> |
|-------------------------------|----------------------------------------------------------|-----------------------|
| <b>Vp</b>                     | Fw: GCTGCCAGGAGGAGAACTAC<br>Rv: AAAAACCGTCGTGGCACTCG     | <b>141</b>            |
| <b>V1aR</b>                   | Fw: AGCATGTGTGACCAC CCT AAG<br>Rv: GGCAGGATATCCAAGAACCCT | <b>104</b>            |
| <b>V2R</b>                    | Fw: GACCCCCCTTTGTGTGCTCA<br>Rv: TCAGGAGGGTGTATCCTTCAT    | <b>206</b>            |
| <b>TGF-<math>\beta</math></b> | Fw: GCTGATCCCGTTGATTTCCA<br>Rv: GCTGAACCAAGGAGACG        | <b>100</b>            |
| <b>RPLP-0</b>                 | Fw: CTCTCGCTTCTGGAGGGTG<br>Rv: ACGCGCTTGTACCCATTGAT      | <b>108</b>            |

**Table 1.** Oligonucleotide sequences
